# Supplementary material for: 『方丈記』が我が身を語る方法 (中世の随筆・日記)
Source: Royal Society of Chemistry journal article supplement (doi:10.1039/d2ra06042f), 2012-05-01
Supplement: d2ra06042f1.pdf [file d2ra06042f1.pdf]

# Supporting Information

## Self-supporting photocatalyst of 2D Bi<sub>2</sub>O<sub>3</sub> anchored on carbon paper for degradation pollutants

Jianwei Zhou<sup>\*a,b</sup>, Chubei Wang<sup>b</sup>, Chen Zhou<sup>c</sup>, Fangfang Duo<sup>b</sup>, Liangliang Chu<sup>b</sup>, Mingliang  
Zhang<sup>b</sup>

<sup>a</sup>*College of Chemistry and Material Engineering, Xinxiang University, Xinxiang 453003, PR  
China*

<sup>b</sup>*Photoelectrocatalytic Material and Micro-nano Application Technology Academician  
Workstation, Xinxiang University, Xinxiang 453003, PR China*

<sup>c</sup>*College of foreign languages, Xinxiang University, Xinxiang 453003, PR China*

**Corresponding authors:** Prof. Jianwei Zhou, College of Chemistry and Material Engineering, Xinxiang University, Xinxiang 453003, China. Phone: +86-373-3682028; Fax: +86-373-3682028; E-mail: jwchow@163.com

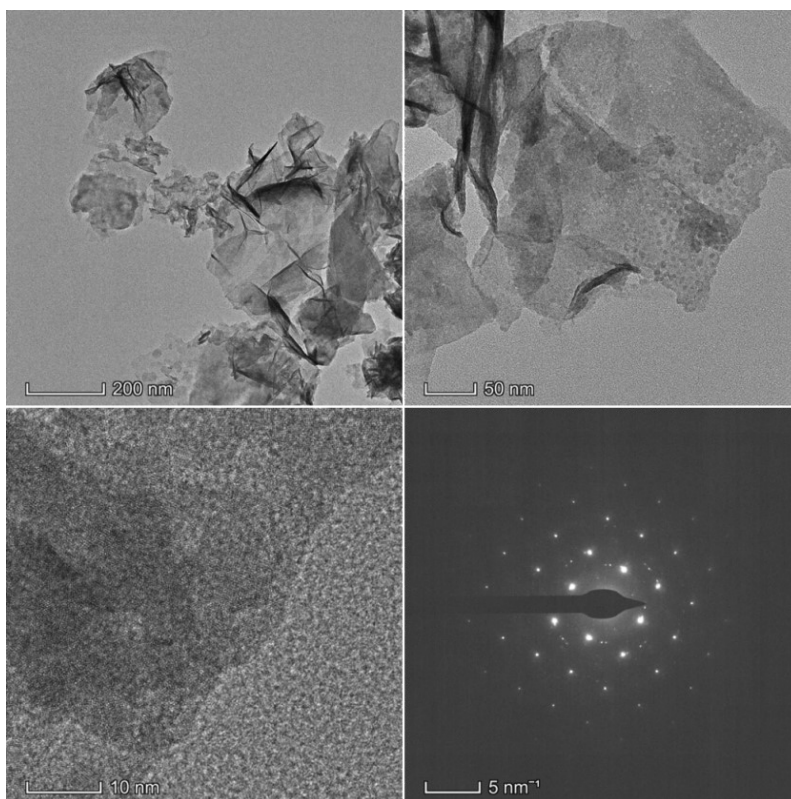

Fig. S1 TEM, HRTEM images and the selected area electron diffraction for  $\text{Bi}_2\text{O}_3$  NS sample.

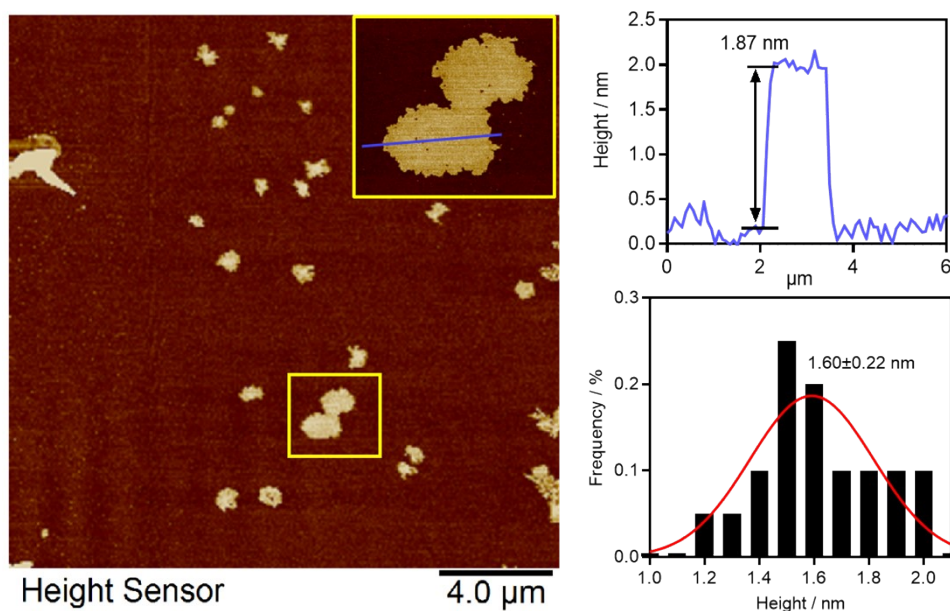

Fig. S2 AFM image and the average thickness distribution of  $\text{Bi}_2\text{O}_3$  NS.

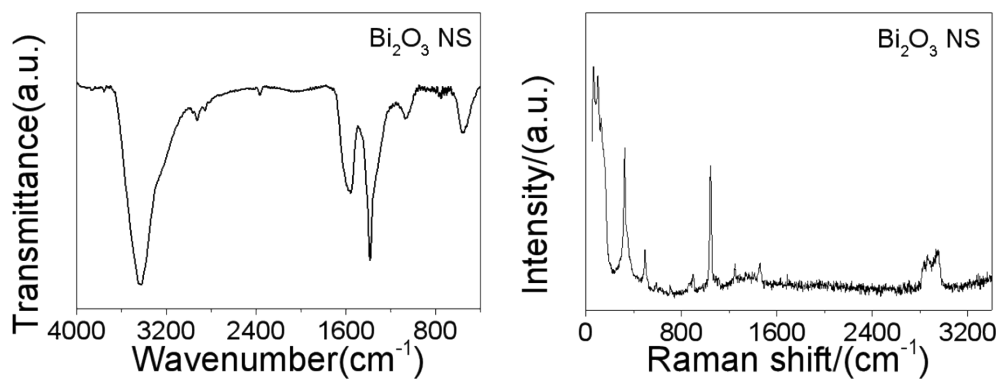

Fig. S3 FT-IR and Raman spectra of Bi<sub>2</sub>O<sub>3</sub> NS (The laser excitation wavelength is 514.53 nm).

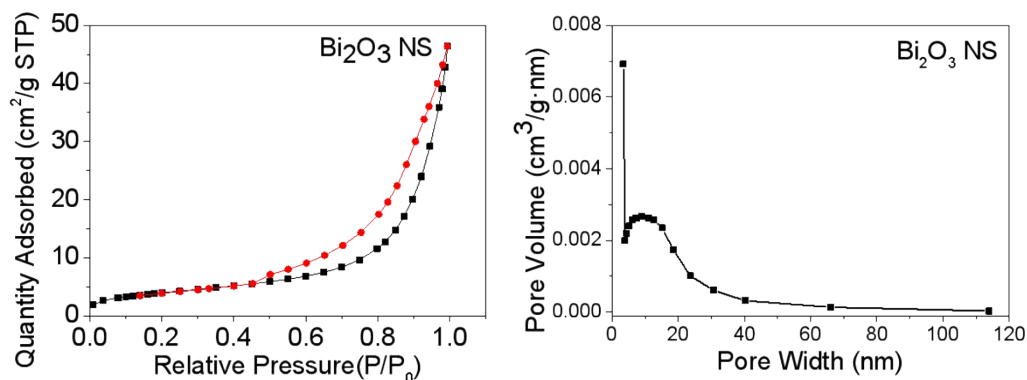

Fig. S4 N<sub>2</sub> adsorption–desorption isotherms curves and pore size distribution curves of Bi<sub>2</sub>O<sub>3</sub> NS.

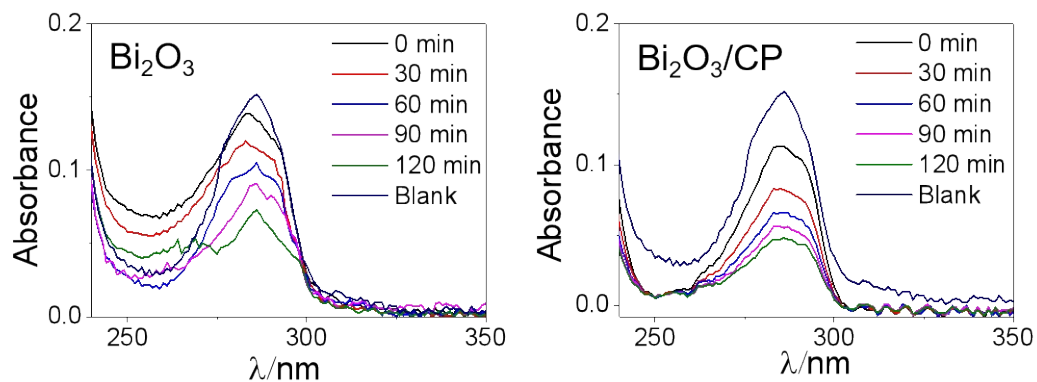

Fig. S5 UV-Vis absorption spectra of 2,4-DCP over Bi<sub>2</sub>O<sub>3</sub> and Bi<sub>2</sub>O<sub>3</sub>/CP for different time periods.

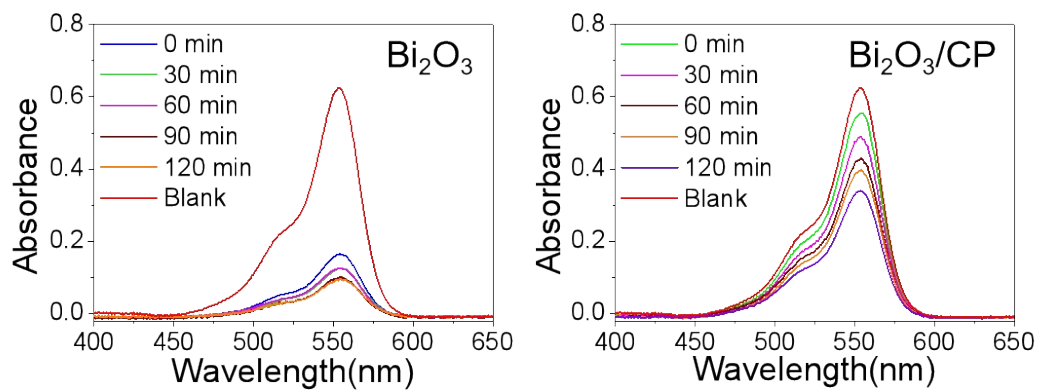

Fig. S6 UV-Vis absorption spectra of RhB over  $\text{Bi}_2\text{O}_3$  and  $\text{Bi}_2\text{O}_3/\text{CP}$  for different time periods.

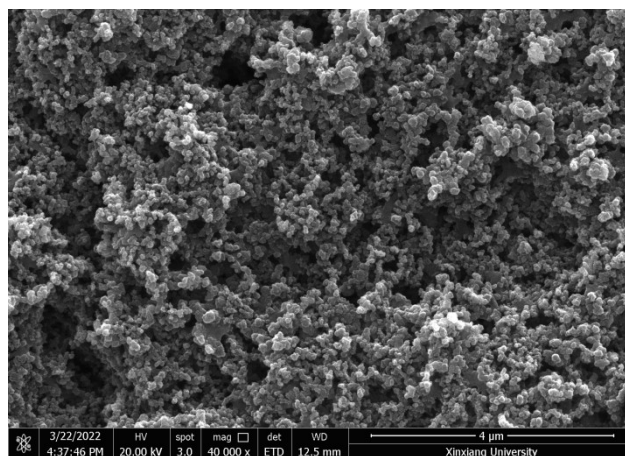

Fig. S7 SEM of carbon paper (micro-porous layer)

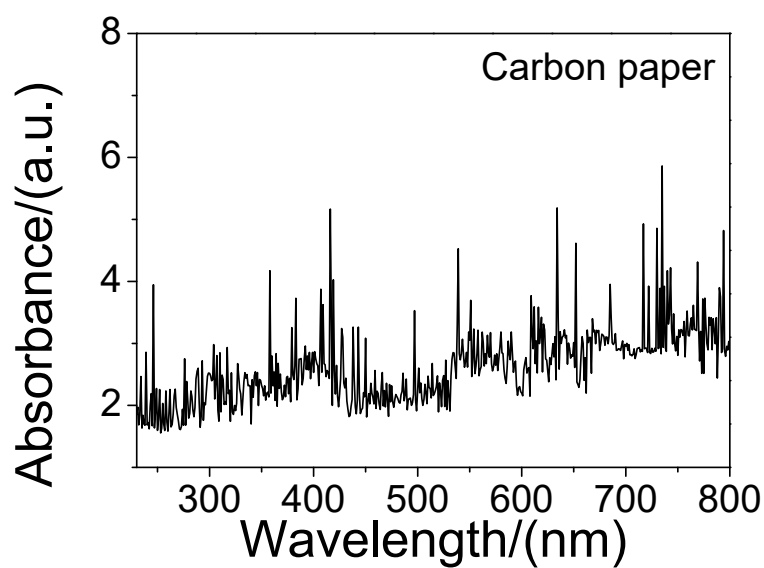

Fig. S8 UV-Vis diffuse reflectance spectra of carbon paper (CP) sample.
